# Supplementary material for: Fanconi Anemia Patients from an Indigenous Community in Mexico Carry a New Founder Pathogenic Variant in FANCG
Source: MDPI journal article supplement (doi:10.3390/ijms23042334), 2022-02-20
Supplement: s1 [file s1]

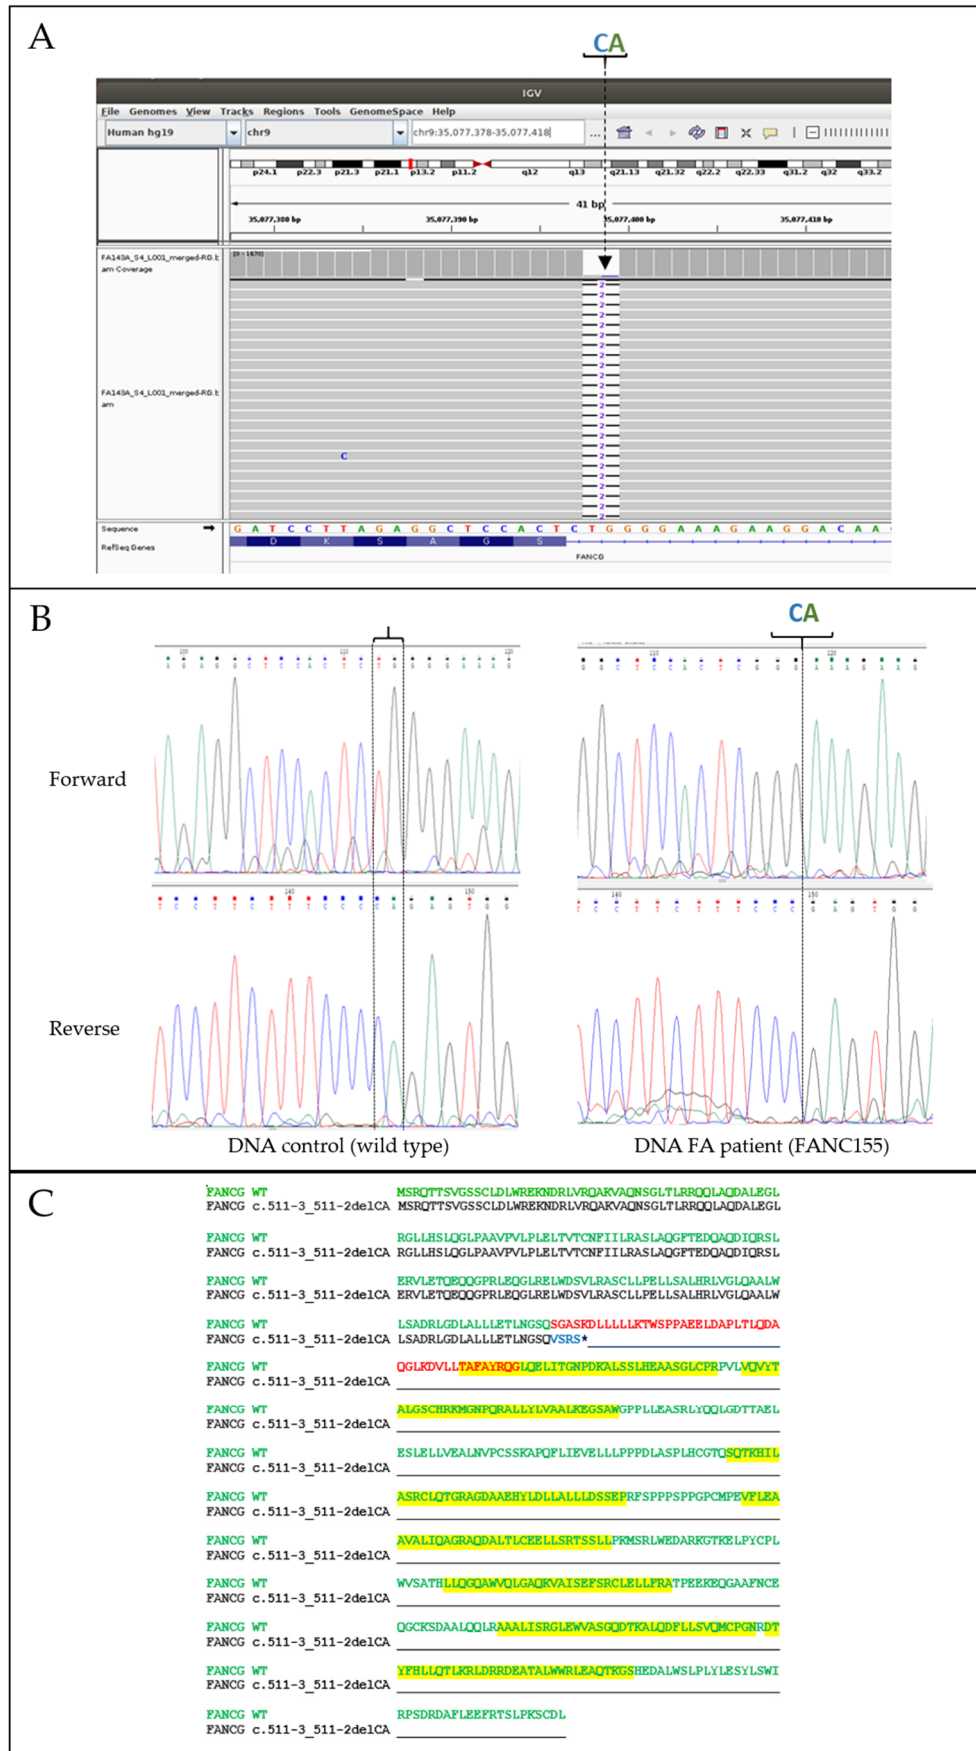

**Figure S1.** Detection of a novel homozygous PV in *FANCG*. (A) The homozygous deletion *FANCG*: c.511-3\_511-2delCA was detected by Haloplex-NGS. Visual exploration of this change in FANCG143.bam file with the

Integrative Genomics Viewer software  
(<http://software.broadinstitute.org/software/igv/>) is displayed. (B) PV *FANCG*: c.511-3\_511-2delCA was corroborated by bidirectional Sanger sequencing. Representative electropherograms of a healthy control and FANCG155 are shown. (C) Amino acid sequence resulting from the wild type (WT) protein (Capital letters in green) and mutant protein (*FANCG* c.511-3\_511-2delCA) (Capital letters in black). Note that the codified amino acids by exon 5 (Capital letters in red) are missing in the *FANCG* mutant protein and FVP frameshift generate a stop codon (Capital letters in blue). Yellow highlight indicates the TPR motifs of the WT protein.
