# Supplementary material for: Fanconi Anemia Patients from an Indigenous Community in Mexico Carry a New Founder Pathogenic Variant in FANCG
Source: MDPI journal article supplement (doi:10.3390/ijms23042334), 2022-02-20
Supplement: s1 [file s1]

Supplementary Table 1. Long-contiguous stretch of homozygosity (LCSH), previously reported as commons in different population. The three FA patients showed LCSH >3Mb in various autosomes, depicted as present.

| FANC32  | FANC143 | FA155   | Locus          | Coordinates                       | Size(Mb) | Population                                                                                                               | References                                                                                                             |
|---------|---------|---------|----------------|-----------------------------------|----------|--------------------------------------------------------------------------------------------------------------------------|------------------------------------------------------------------------------------------------------------------------|
| Present |         |         | 1p33p32.3      | chr1:49,205,205<br>- 53,121,054   | 3.9      | California, USA<br>CEU, Hispanic.<br>Florianopolis,<br>Brazil<br>CEU                                                     | Kearney/Sanchez,<br>personal<br>communication 2017<br>in Chaves <i>et al.</i> , 2019                                   |
| Present |         |         | 1q21.2q21.3    | chr1:147,215,796<br>- 150,287,884 | 3.1      | California, USA<br>CEU, Hispanic.<br>Florianopolis,<br>Brazil<br>CEU                                                     | Kearney/Sanchez,<br>personal<br>communication 2017<br>in Chaves <i>et al.</i> , 2019                                   |
| Present |         | Present | 3p21.33p21.1   | chr3:48,787,219<br>- 50,483,437   | 1.7      | California, USA<br>CEU, Hispanic                                                                                         | Wang <i>et al.</i> , 2015                                                                                              |
|         |         | Present | 6p22.3p21.31   | chr6:26,184,041<br>- 30,071,279   | 3.9      | Estonia                                                                                                                  | Pajusalu <i>et al.</i> , 2015                                                                                          |
|         | Present | Present | 7q11.22q11.23  | chr7:76,128,151-<br>71,997,278    | 4.1      | Florianopolis,<br>Brazil<br>CEU                                                                                          | Chaves <i>et al.</i> 2019                                                                                              |
|         | Present |         | 11p11.2q12.1   | chr11:46,342,376<br>- 51,274,692  | 4.9      | California, USA<br>CEU, hispanic                                                                                         | Wang <i>et al.</i> , 2015                                                                                              |
| Present |         |         | 20q11.21q11.23 | chr20:31,940,638<br>- 36,081,725  | 4.1      | Taipei, Taiwan<br>Han Chinese,<br>Taiwanese, CEU<br>California, USA<br>CEU, Hispanic.<br>Florianopolis,<br>Brazil<br>CEU | Ling-Hui <i>et al.</i> , 2006/<br>Kearney/Sanchez,<br>personal<br>communication 2017<br>in Chaves <i>et al.</i> , 2019 |

Chaves, TF; Oliveira, LF; Ocampos, M; Barbato, IT; de Luca, GR; Filho, JHB; Pinto, LLC; Bernardi, P y Maris, AF. Long contiguous stretches of homozygosity detected by chromosomal microarrays (CMA) in patients with neurodevelopmental disorders in the South of Brazil. BMC Med Genom (2019) 12(50):1-13.

Ling-Hui, L; Sheng-Feng, H; Chien-Hsiun, C; Chun-Yu, W; Wan-Ching, W; Li-Ying, L; Shuen-Iu, H; Wen-Hung, C; Wen-Han, P; et al. Long Contiguous Stretches of Homozygosity in the Human Genome. Hum Mutat (2006) 27(11):1115-1121.

Pajusalu, S; Zilina, O; Yakoreva, M; Tammur, P; Kuuse, K; Mölter-Väär, T; Nõukas, M; Reimand, T y Ôunap, K. The Diagnostic Utility of Single Long Contiguous Stretches of Homozygosity in Patients without Parental Consanguinity. Mol Syndromol (2015) 6:135-140.

Wang, JC; Ross, L; Mahon, LW; Owen, R; Hemmat, M; Wang, BT; Naggar, ME; Kopita, KA; Randolph, LM; Chase, JM; Aguilera, MJM; et al. Regions of homozygosity identified by oligonucleotide SNP arrays: evaluating the incidence and clinical utility. Eur J Hum Genet (2015) 23:663-671.
